# Supplementary material for: Solar-driven broad spectrum fungicides based on monodispersed Cu7S4 nanorods with strong near-infrared photothermal efficiency
Source: Royal Society of Chemistry journal article supplement (doi:10.1039/c6ra22737f), 2016-01-01
Supplement: c6ra22737f1.pdf [file c6ra22737f1.pdf]

*Electronic Supplementary Information*

**Solar-Driven Broad Spectrum Fungicides Based on Monodispersed Cu<sub>7</sub>S<sub>4</sub> Nanorods with Strong Near-Infrared Photothermal Efficiency**

Gaofei Hu,<sup>\*a</sup> Tiantian Xu,<sup>a</sup> Xiaoqing Chen,<sup>a</sup> Tony D. James<sup>b</sup> and Suying Xu<sup>\*a</sup>

<sup>a</sup>State Key Laboratory of Chemical Resource Engineering, Beijing University of Chemical Technology, Beijing 100029, P. R. China.

<sup>b</sup>Department of Chemistry, University of Bath, Bath, BA2 7AY, United Kingdom.

Corresponding author:

\*Email: hugf@mail.buct.edu.cn. Phone: +86-10-64433197.

syxu@mail.buct.edu.cn. Phone: +86-10-64433197.

Table S1 Reaction conditions for Cu<sub>7</sub>S<sub>4</sub> with different morphologies

|                                       | Precursor                          |                                                      | Temperature         |                     | DDT <sup>a</sup> |
|---------------------------------------|------------------------------------|------------------------------------------------------|---------------------|---------------------|------------------|
|                                       | HS <sub>2</sub> CNBut <sub>2</sub> | Cu(NO <sub>3</sub> ) <sub>2</sub> ·3H <sub>2</sub> O | T <sub>1</sub> (°C) | T <sub>R</sub> (°C) |                  |
| Recipe for nanoplates (Previous work) | 43.1 mg                            | 0.1 mmol                                             | 205                 | 190                 | 0.08 mL          |
| urrent work                           | 2.1 mg                             | 0.1 mmol                                             | 205                 | 190                 | 0 mL             |

<sup>a</sup> DDT: dodecanethiol

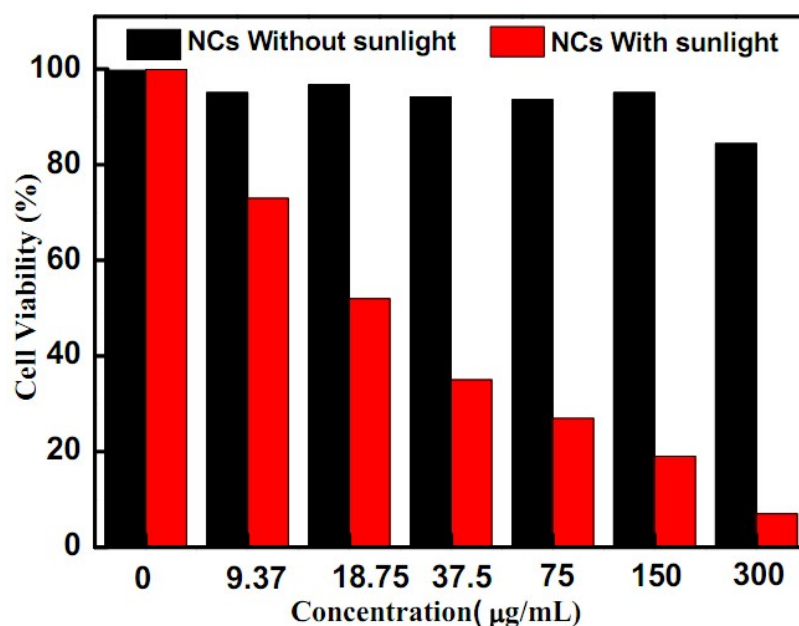

**Fig. S1.** Cytotoxicity of Cu<sub>7</sub>S<sub>4</sub> NCs in the absence and presence of the simulated sunlight irradiation at different concentrations (9.37, 18.75, 37.5, 75, 150, 300 µg/mL) in HeLa cell lines after incubation for 24 h. The power density of the simulated sunlight was 1.0 W/cm<sup>2</sup>. The irradiation time was 5 min.

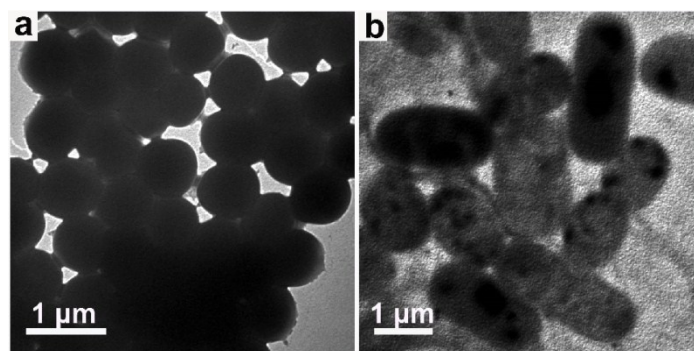

**Fig. S2.** TEM images of *S. aureus* (a) and *E. coli* (b).

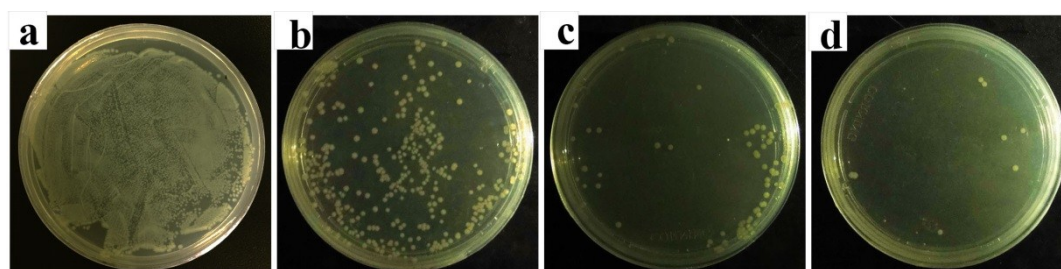

**Fig. S3.** Photographs of *E. coli* bacteria for viable count. All the *E. coli* bacteria were cultured in agar plates and incubated for 24 h before counting. The concentration of bacterium seeds (50 μL) for each plate is as follows. (a) The original concentration of *E. coli*; (b-d) the solution of (a) was diluted by  $10^3$  (b),  $10^4$  (c), and  $10^5$  (d) times.

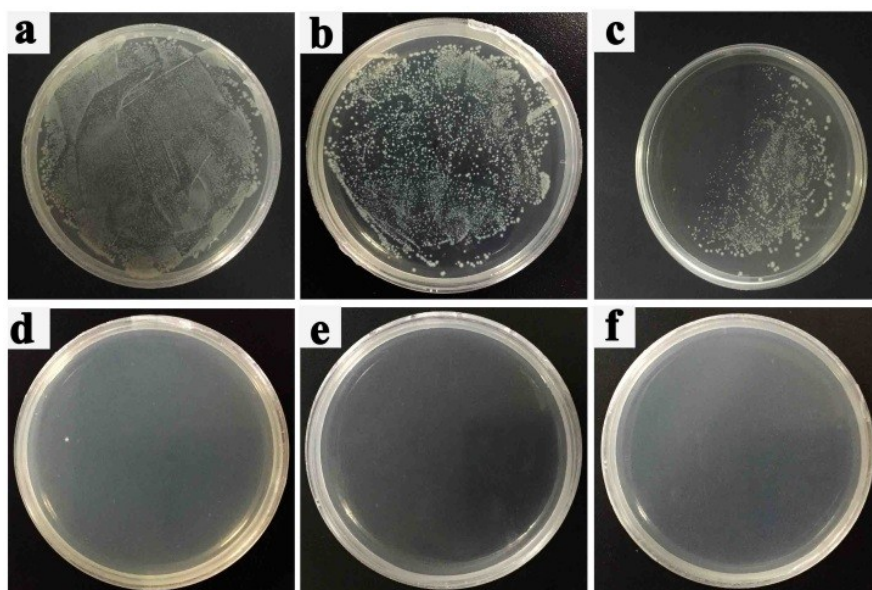

**Fig. S4.** Photothermal anti-bacteria efficiency of  $\text{Cu}_7\text{S}_4$  NCs on *E. coli* with the simulated sunlight irradiation for (a) 0, (b) 0.5, (c) 1, (d) 2, (e) 3, and (f) 4 min. The  $\text{Cu}_7\text{S}_4$  NCs (500  $\mu\text{L}$ , 300  $\mu\text{g}/\text{mL}$ ) and bacteria (200  $\mu\text{L}$ ,  $10^7$  CFU/mL) were mixed into PBS to afford a total volume of 2 mL solution and then irradiated with the simulated sunlight (1.0  $\text{W}/\text{cm}^2$ ) for desired time. After irradiation, 50  $\mu\text{L}$  of the bacterium suspension was cultured in the agar plate and incubated at 37  $^\circ\text{C}$  for 24 h before photographing and counting.

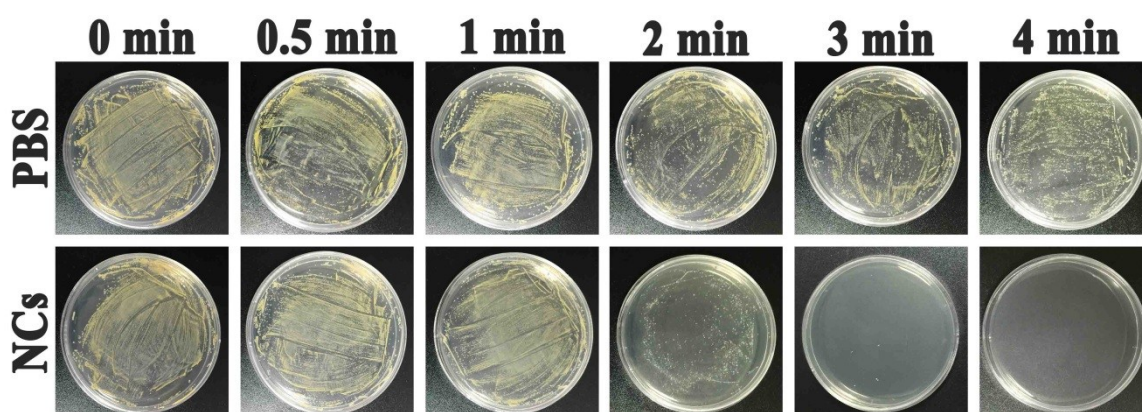

**Fig. S5.** Photothermal anti-bacteria efficiency of  $\text{Cu}_7\text{S}_4$  NCs on *S. aureus* with the simulated sunlight irradiation for 0, 0.5, 1, 2, 3, and 4 min, respectively. The  $\text{Cu}_7\text{S}_4$  NCs (500  $\mu\text{L}$ , 300  $\mu\text{g}/\text{mL}$ ) and bacteria (200  $\mu\text{L}$ ,  $10^7$  CFU/mL) were mixed into PBS to afford a total volume of 2 mL solution and then irradiated with the simulated sunlight (1.0  $\text{W}/\text{cm}^2$ ) for desired time. After irradiation, 50  $\mu\text{L}$  of the bacterium suspension was cultured in the agar plate and incubated at 37  $^\circ\text{C}$  for 24 h before photographing and counting.

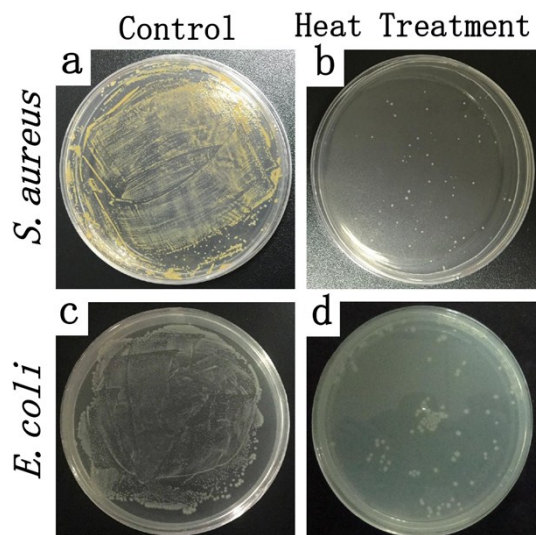

**Fig. S6.** Evaluation of photothermal anti-bacteria efficiency by heat-treatment for 4 min in the absence of  $\text{Cu}_7\text{S}_4$  NCs. The control group (a, c): without heat treatment; the heat-treatment group (b, d): the bacteria samples were treated with heat under  $70^\circ\text{C}$  for 4 min.

Detailed procedures: bacterium solution ( $200\ \mu\text{L}$ ,  $10^7$  CFU/mL) was mixed into PBS buffer to afford a total volume of 2 mL. For the heat-treatment group, the prepared suspensions were further treated with heat. Then, for both control and experimental groups,  $50\ \mu\text{L}$  of the bacterium suspension was cultured in the agar plate and incubated at  $37^\circ\text{C}$  for 24 h before photographing and counting.
